# Supplementary material for: Therapeutic Effects of Modified Si-Miao-Yong-An Decoction in the Treatment of Rat Myocardial Ischemia/Reperfusion Injury
Source: Hindawi journal article supplement (doi:10.1155/2022/1442405), 2022-06-06

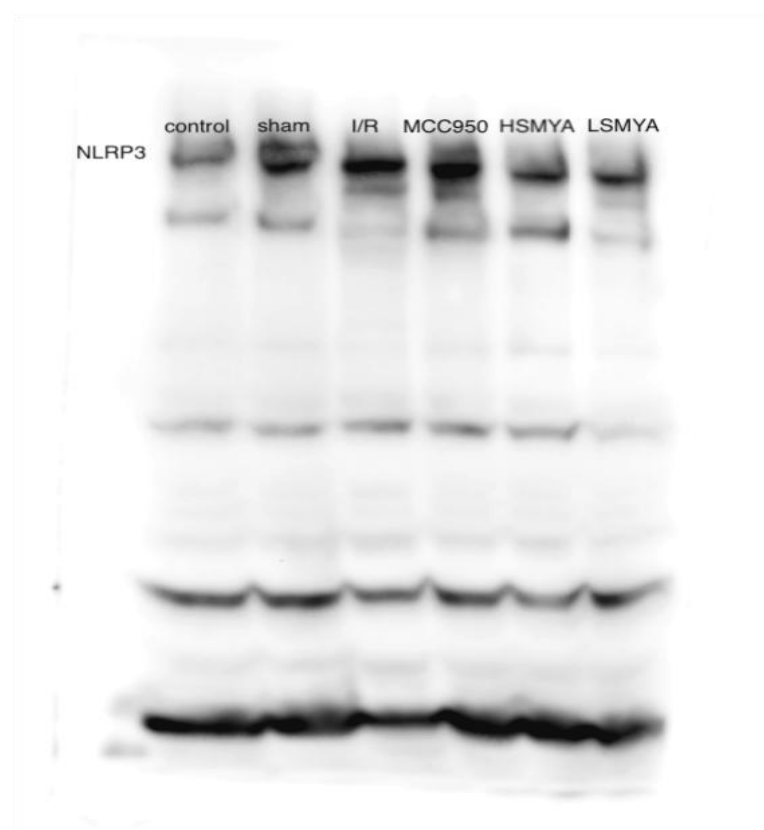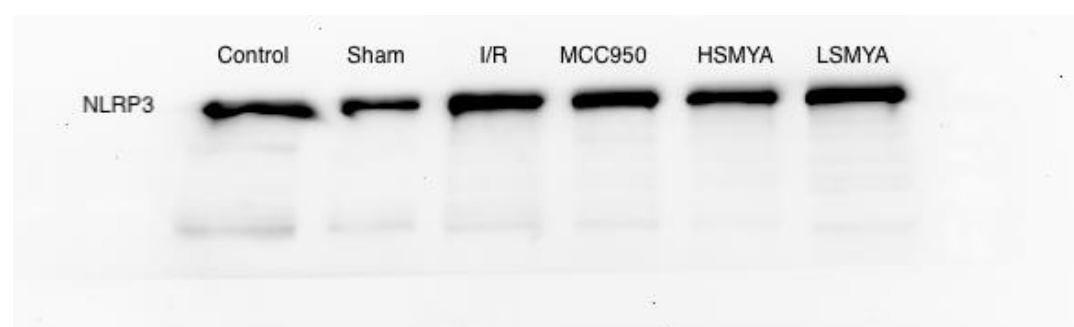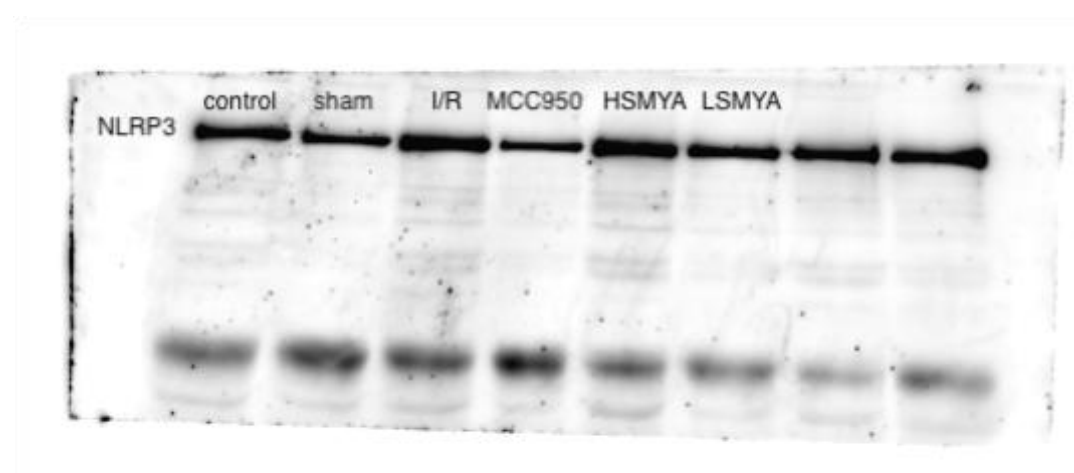

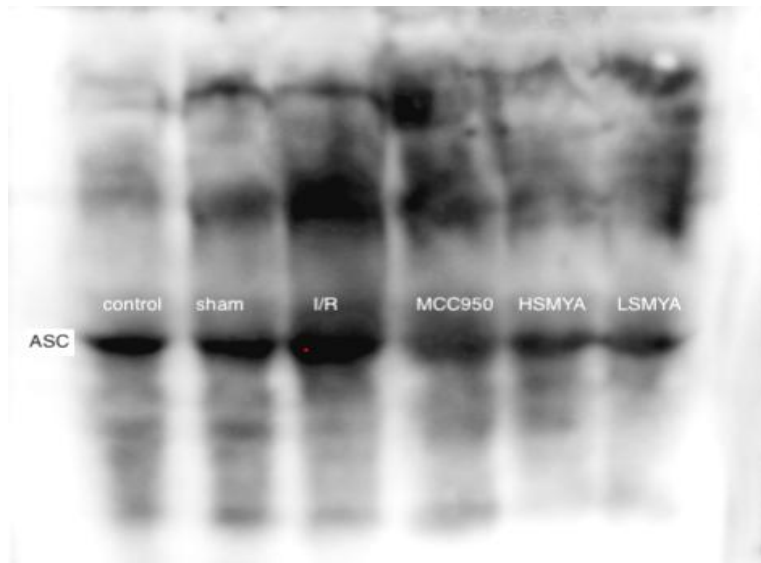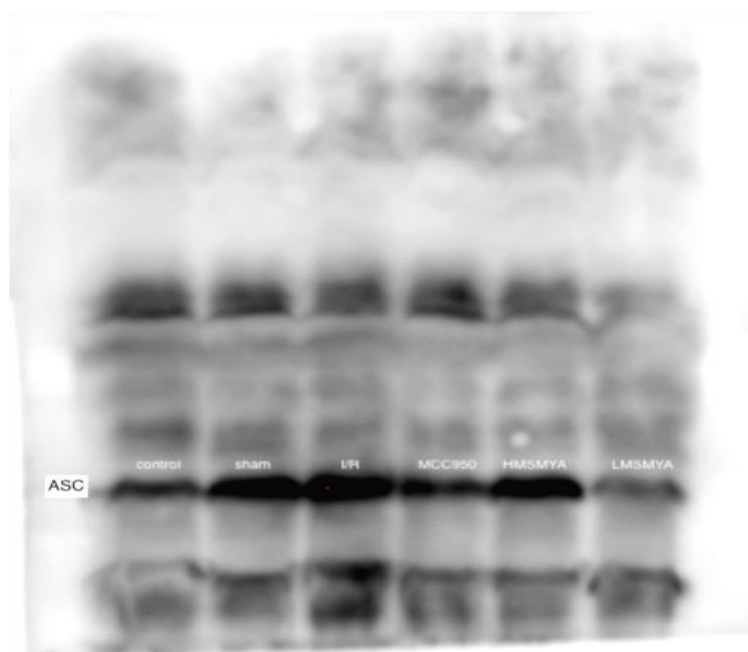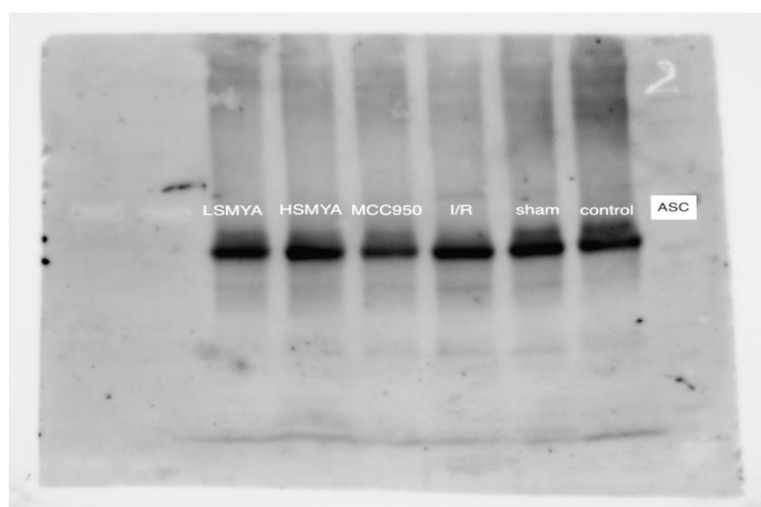

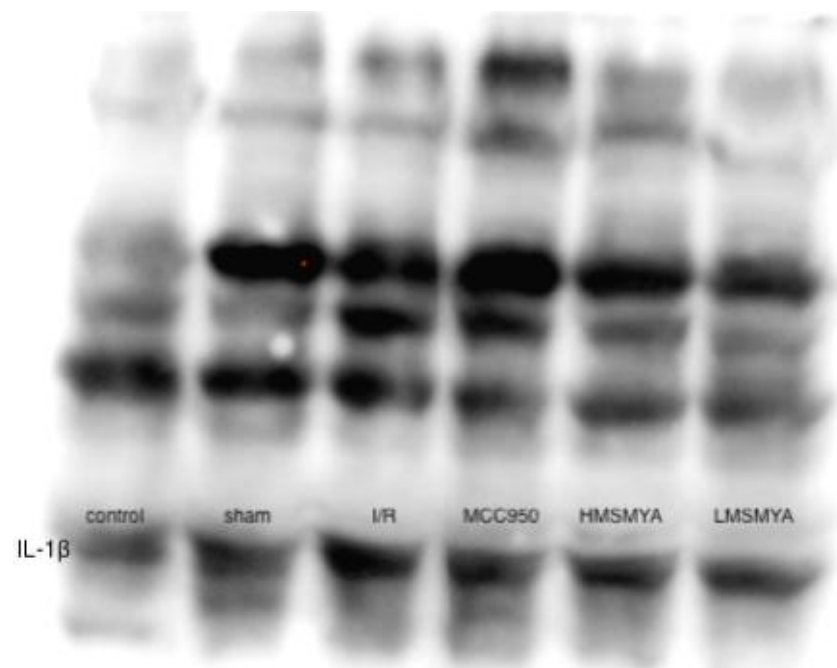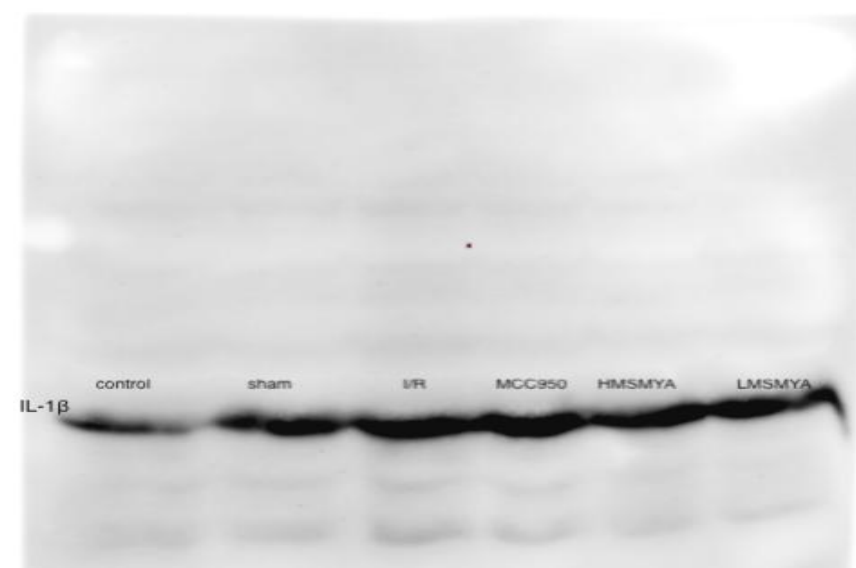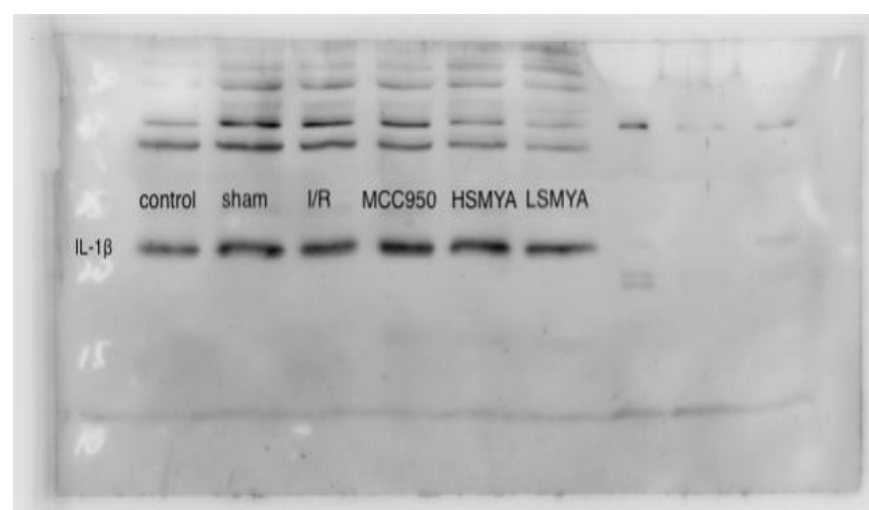

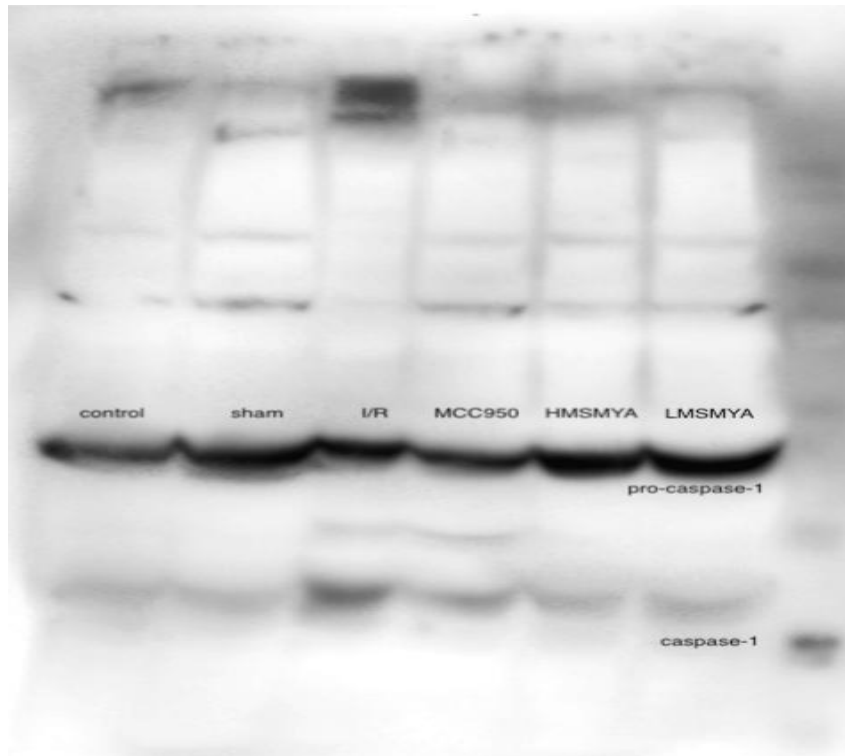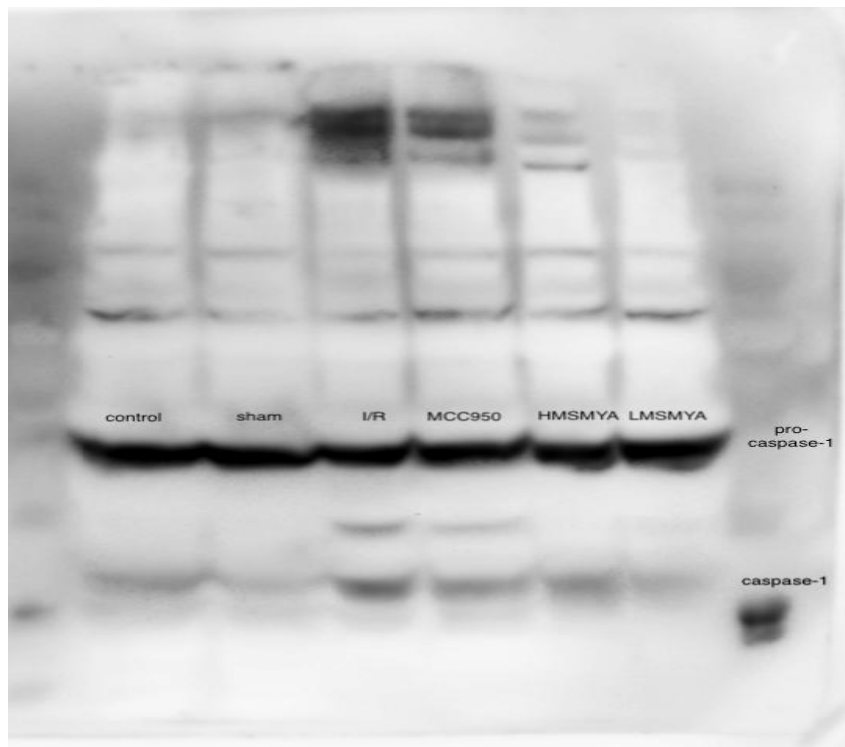

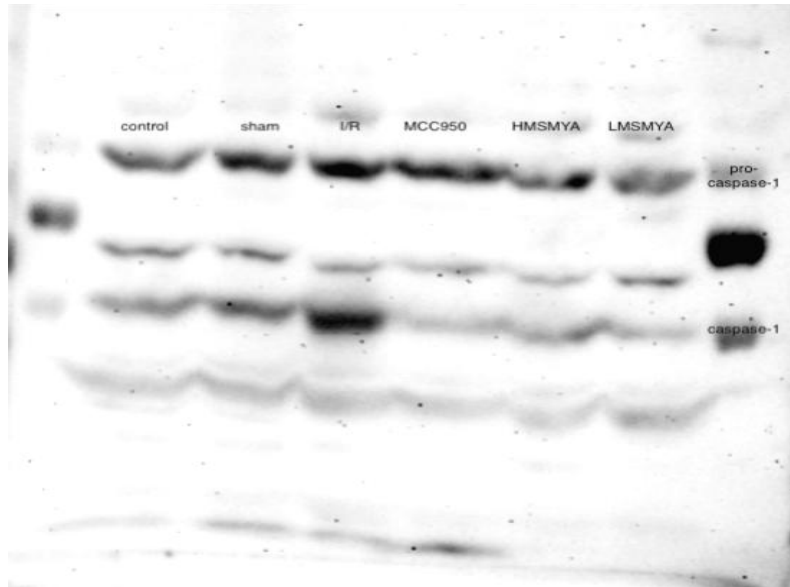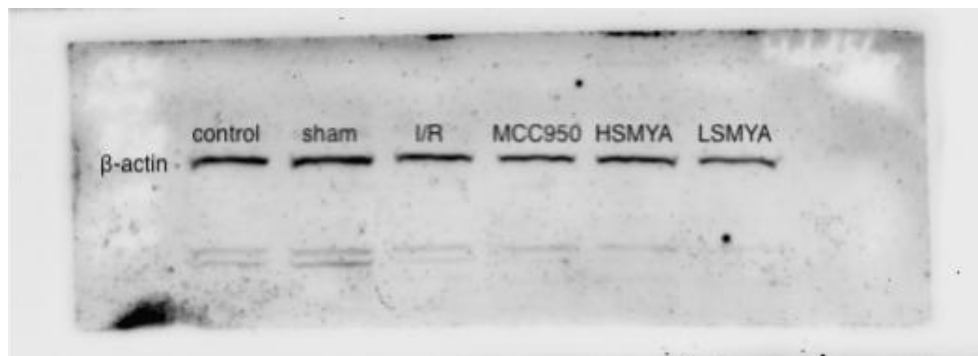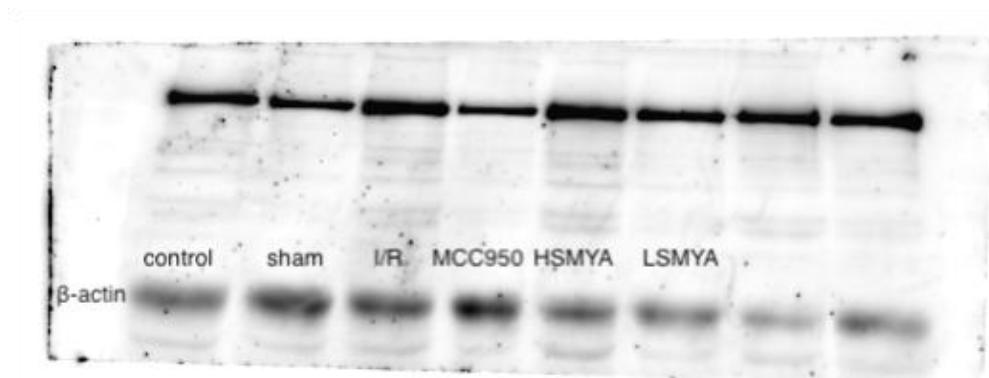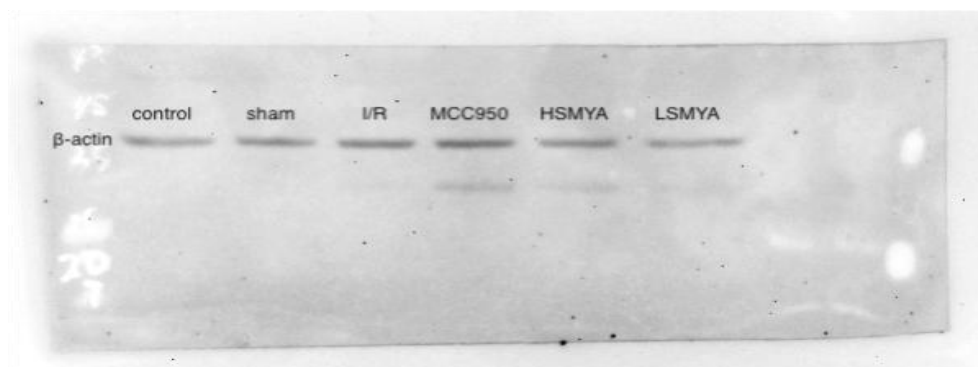

Supplement: f1 [file 1442405.f1.pdf]
